# Supplementary material for: Differential immunological responses in lamb rumen and colon to alfalfa hay and wheat straw in a concentrate-rich diet: insights into microbe-host interactions
Source: PubMed Central journal article supplement (PMC11494937; doi:10.1128/msystems.00483-24), 2024-09-17
Supplement: msystems.00483-24-s0002.pdf [file msystems.00483-24-s0002.pdf]

# Graphical Abstract

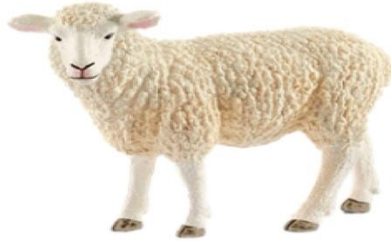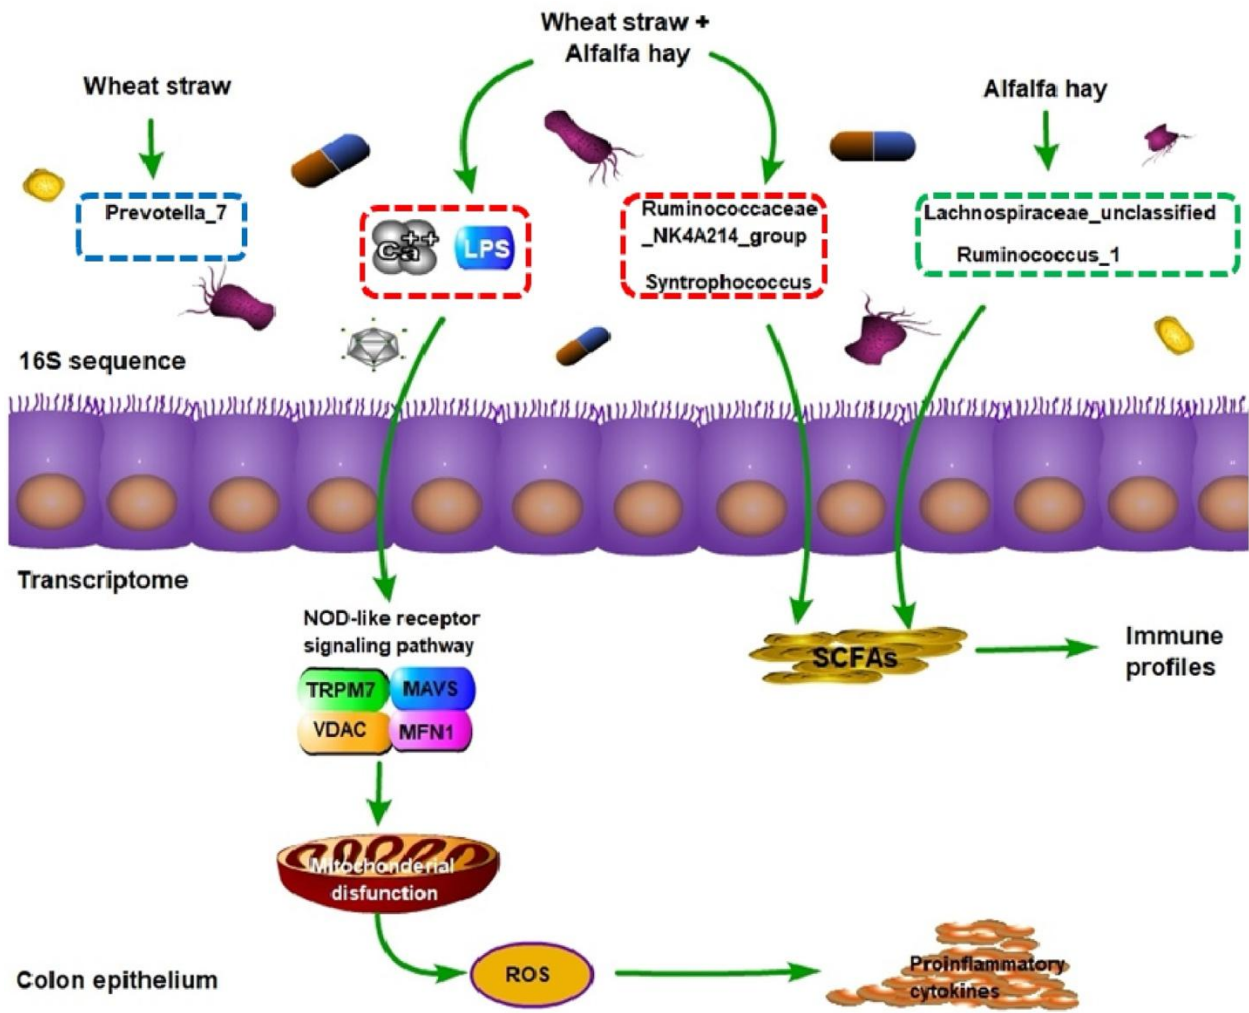

Systematic illustration of how alfalfa hay and wheat straw alone or combined alters the colon bacteria and epithelium in lambs fed in a HGB diet.
